# Supplementary material for: Allicin Improves Metabolism in High-Fat Diet-Induced Obese Mice by Modulating the Gut Microbiota
Source: PubMed Central journal article supplement (PMC6949904; doi:10.3390/nu11122909), 2019-12-02
Supplement: nutrients-11-02909-s001.pdf [file nutrients-11-02909-s001.pdf]

| <b>Genes</b> | <b>Primers</b> | <b>Nucleotide sequence of primers (5'-3')</b> | <b>Size(bp)</b> |
|--------------|----------------|-----------------------------------------------|-----------------|
| ATGL         | Forward        | TTCGCAATCTCTACCGCCTC                          | 136             |
|              | Reverse        | AAAGGGTTGGGTGGTTCAG                           |                 |
| HSL          | Forward        | GCTGGGCTGTCAAGCACTGT                          | 160             |
|              | Reverse        | GTAAGTGGGTAGGCTGCCAT                          |                 |
| LPL          | Forward        | CCAATGGAGGCACTTTCCA                           | 85              |
|              | Reverse        | TGGTCCACGTCTCCGAGTC                           |                 |
| PGC1a        | Forward        | AGCCGTGACCACTGACAACGAG                        | 168             |
|              | Reverse        | GCTGCATGGTTCTGAGTGCTAAG                       |                 |
| UCP1         | Forward        | GGCATTGAGAGGCAAATCAGCT                        | 151             |
|              | Reverse        | CAATGAACACTGCCACACCTC                         |                 |
| CIDEA        | Forward        | TGCTCTTCTGTATCGCCCAGT                         | 113             |
|              | Reverse        | GCCGTGTTAAGGAATCTGCTG                         |                 |
| Cox7a        | Forward        | GCTCTGGTCCGGTCTTTTAGC                         | 100             |
|              | Reverse        | GTACTGGGAGGTCATTGTCGG                         |                 |
| PRDM16       | Forward        | CGGAAGAGCGTGAGTACAAATG                        | 133             |
|              | Reverse        | TCCGTGAACACCTTGACACAGT                        |                 |
| Adipoq       | Forward        | GTCTGTACGATTGTCAGTGGATCTG                     | 78              |
|              | Reverse        | AAGAGGAACAGGAGAGCTTGCA                        |                 |
| Leptin       | Forward        | GAGACCCCTGTGTCGGTTC                           | 139             |
|              | Reverse        | CTGCGTGTGTGAAATGTCATTG                        |                 |
| Resistin     | Forward        | AAGAACCTTTCATTTCCCCTCCT                       | 167             |
|              | Reverse        | GTCCAGCAATTTAAGCCAATGTT                       |                 |
| IRS1         | Forward        | CGATGGCTTCTCAGACGTG                           | 209             |
|              | Reverse        | CAGCCCGCTTGTTGATGTTG                          |                 |
| IRS2         | Forward        | CTGCGTCCTCTCCCAAAGTG                          | 124             |
|              | Reverse        | GGGGTCATGGGCATGTAGC                           |                 |
| IRS3         | Forward        | TCGGCTCACCGTTTCCTTG                           | 133             |
|              | Reverse        | TCGCTCTCGTAGCACTCCA                           |                 |
